# Supplementary material for: Large-scale conversion of helical-ribbon carbon nanofibers to a variety of graphene-related materials
Source: Royal Society of Chemistry journal article supplement (doi:10.1039/c6ra08865a), 2016-01-01
Supplement: c6ra08865a1.pdf [file c6ra08865a1.pdf]

## Supplementary Information

**Table S1.** Chemical characteristics of the pristine carbon nanofibers and functionalized graphene nanoplatelets

| Sample | Elemental analysis |      | XPS    |        |        |     |                  |                  |      |     |        |
|--------|--------------------|------|--------|--------|--------|-----|------------------|------------------|------|-----|--------|
|        | C                  | O    | C1s    | O1s    | N1s    | C/O | Csp <sup>2</sup> | Csp <sup>3</sup> | C-O  | C=O | OH-C=O |
|        | (%)                | (%)  | (at.%) | (at.%) | (at.%) |     | (%)              | (%)              | (%)  | (%) | (%)    |
| GANF   | 99.6               | 0.4  | -      | -      | -      | -   | -                | -                | -    | -   | -      |
| OF1    | 51.8               | 36.9 | 78     | 21     | 1      | 4.0 | 54.0             | 16.4             | 13.5 | 3.6 | 11.7   |
| OF2    | 55.5               | 38.7 | 78     | 22     | -      | 3.6 | 37.8             | 35.3             | 7.6  | 7.6 | 10.0   |

**Figure S1.** SEM images of the reduced graphene oxides prepared by flash-pyrolysis at 1000°C

**rGO1-1000**

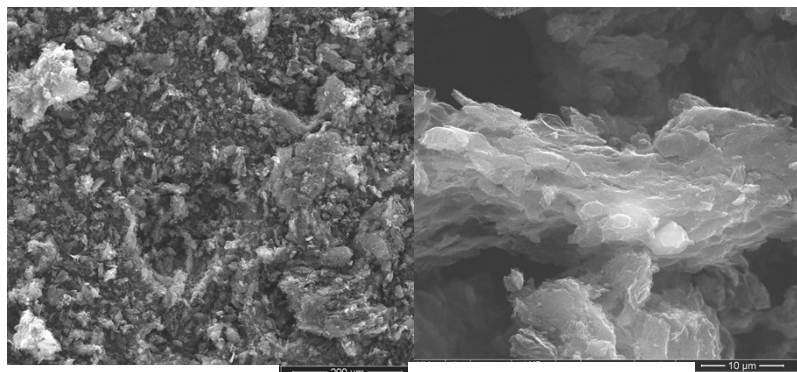

**rGO2-1000**

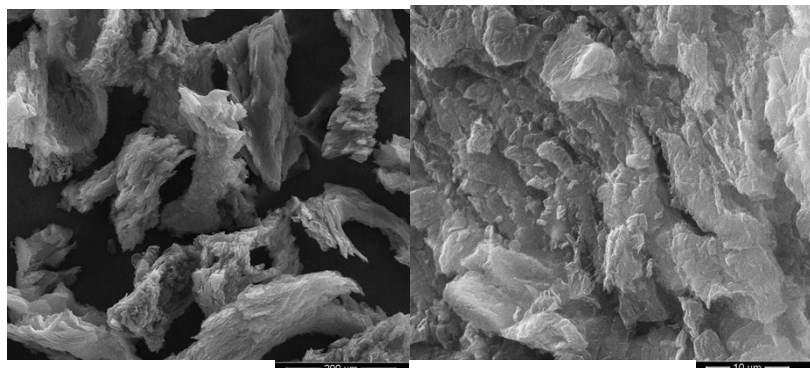

**Figure S2.** TEM images of diverse graphene-related materials

### Graphene Oxides

**GO1**

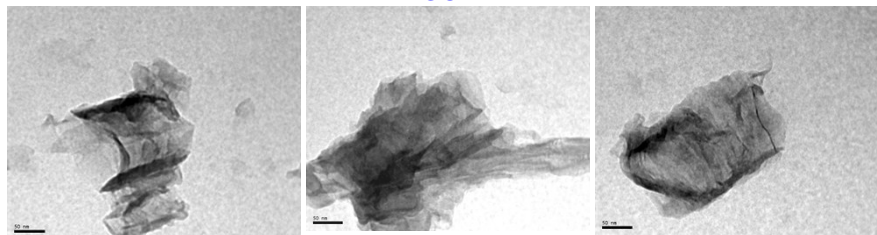

**GO2**

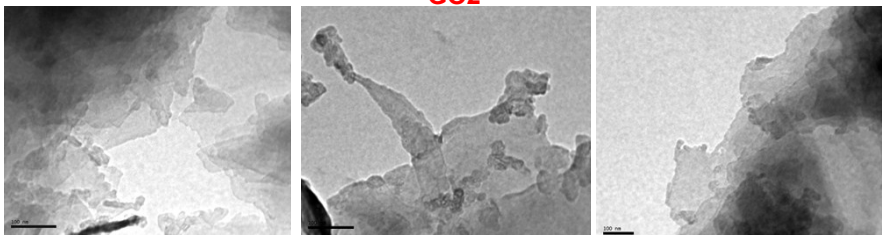

### Reduced Graphene Oxides

**rGO1-1000**

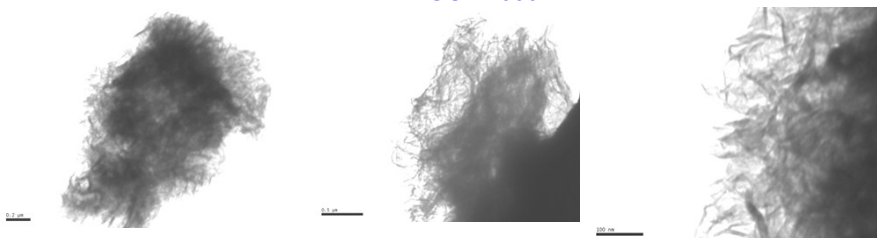

**rGO2-1000**

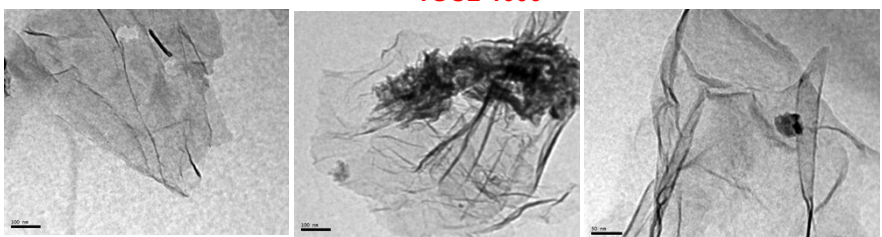

### Activated Graphene Nanoplatelets

**OF2-A**

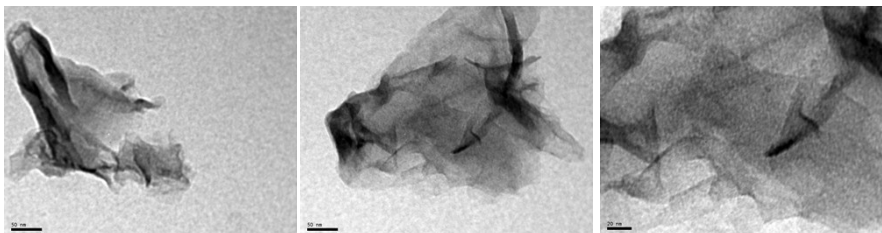

**Figure S3.** Galvanostatic charge-discharge cycles at 1 A/g (20 mA/cm<sup>2</sup>) for the different graphene-related materials

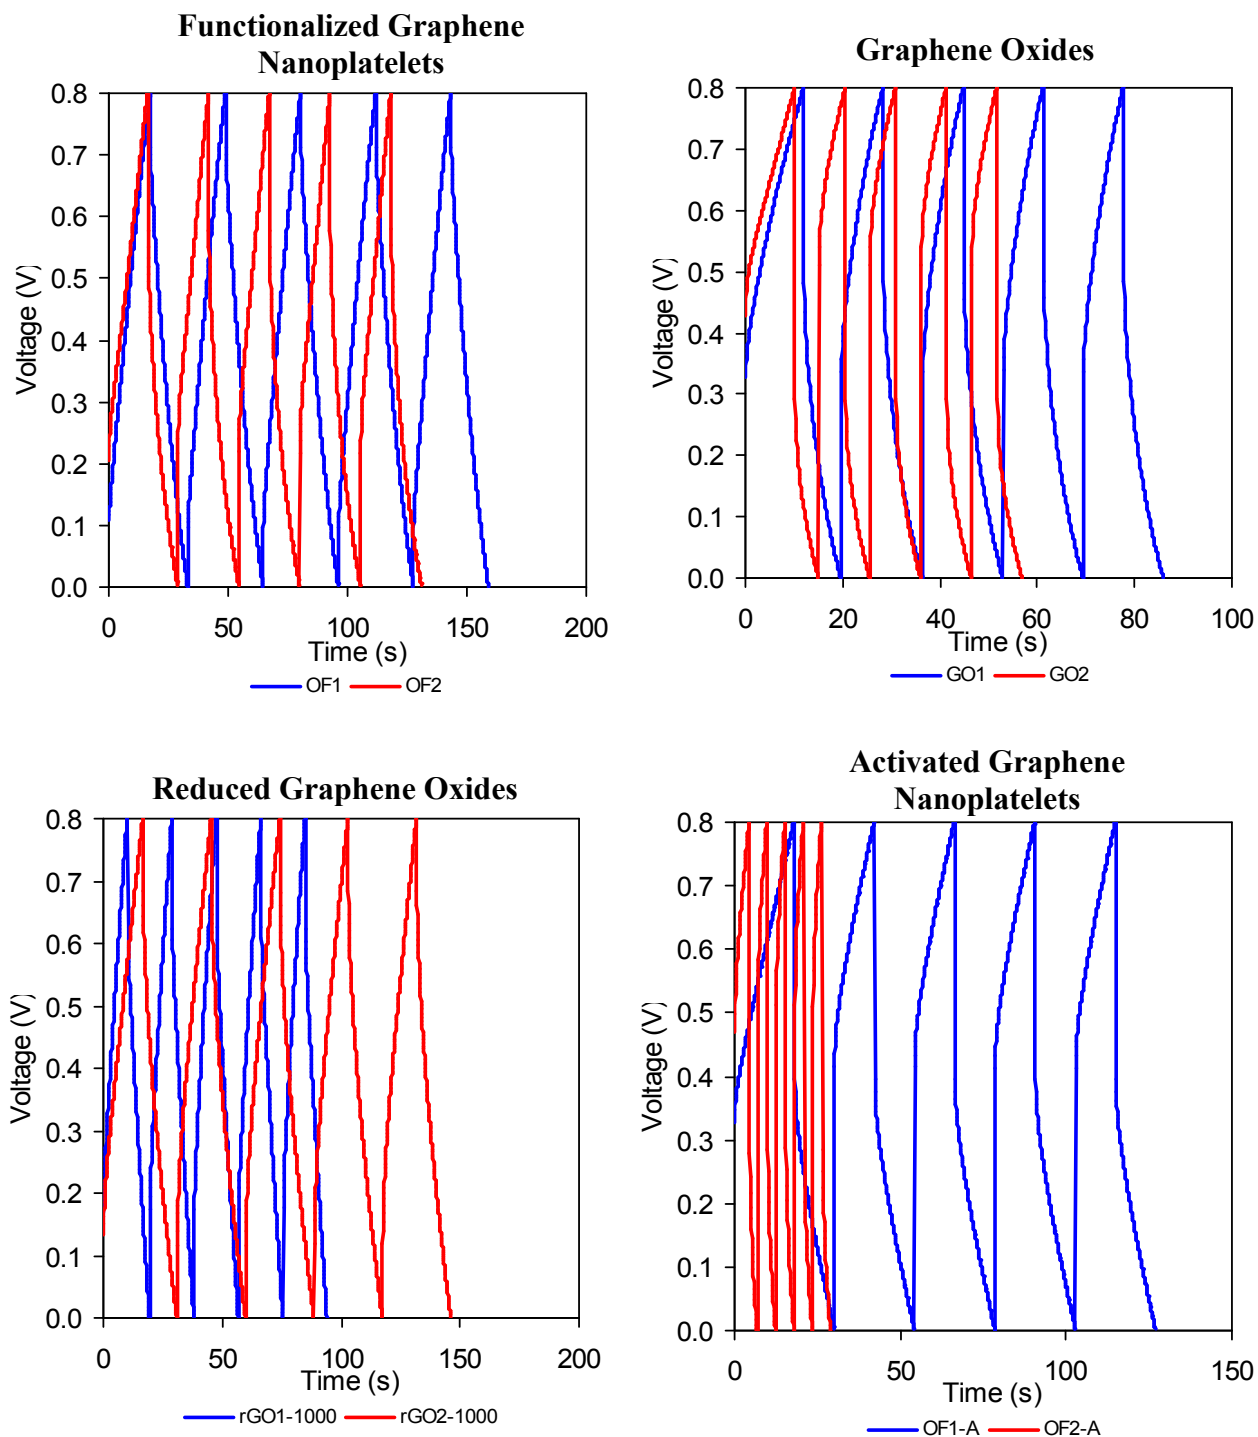

**Table S2.** Specific capacitance obtained from galvanostatic charge-discharge tests (after 200 cycles) and cyclic voltammetry

|                                                 | Intensity<br>(mA/cm <sup>2</sup> ) | OF1 | OF2 | GO1 | GO2 | rGO1-1000 | rGO2-1000 | OF1-A | OF2-A |
|-------------------------------------------------|------------------------------------|-----|-----|-----|-----|-----------|-----------|-------|-------|
| Galvanostatic<br>charge-<br>discharge<br>cycles | 1                                  | 82  | 118 | 105 | 120 | 42        | 80        | 100   | 69    |
|                                                 | 3                                  | 75  | 104 | 91  | 101 | 39        | 76        | 96    | 60    |
|                                                 | 5                                  | 71  | 94  | 76  | 85  | 38        | 74        | 94    | 53    |
|                                                 | 7                                  | 69  | 87  | 68  | 70  | 37        | 72        | 92    | 46    |
|                                                 | 10                                 | 66  | 79  | 55  | 60  | 36        | 69        | 89    | 34    |
|                                                 | 20                                 | 59  | 62  | 40  | 46  | 33        | 59        | 75    | 10    |
|                                                 | 30                                 | 54  | 51  | 32  | 30  | 31        | 50        | 53    | -     |
|                                                 | 50                                 | 48  | 31  | 17  | -   | 26        | 37        | 20    | -     |
|                                                 | 70                                 | 44  | -   | -   | -   | 22        | 30        | -     | -     |
|                                                 | 100                                | 40  | -   | -   | -   | 18        | -         | -     | -     |
|                                                 | Scan rate<br>mV/s)                 | OF1 | OF2 | GO1 | GO2 | rGO1-1000 | rGO2-1000 | OF1-A | OF2-A |
| Cyclic<br>Voltammetry                           | 1                                  | 83  | 104 | 107 | 116 | 46        | 79        | 98    | 65    |
|                                                 | 2                                  | 79  | 93  | 94  | 97  | 43        | 76        | 92    | 59    |
|                                                 | 5                                  | 70  | 76  | 74  | 69  | 38        | 70        | 79    | 45    |
|                                                 | 10                                 | 64  | 62  | 52  | 48  | 35        | 63        | 64    | 30    |
|                                                 | 20                                 | 56  | 47  | 34  | 30  | 31        | 53        | 42    | 17    |
|                                                 | 50                                 | 44  | 28  | 17  | 12  | 25        | 36        | 16    | 6     |

The capacitance  $C$  was determined by galvanostatic charge–discharge voltage cycles from 0 to 0.8V at different current densities ranging from 1 to 100 mA/cm<sup>2</sup> of electrode surface. The specific capacitance  $C$  (F/g) of a single electrode has been calculated by using the equation

$$C = 2 I t_d / m_c V_d,$$

where  $I$  is the current density,  $t_d$  the time spent during the discharge,  $V_d$  the voltage decrease in the discharge and  $m_c$  is the weight of carbon loaded in the composite electrode (M.D. Stoller and R.S. Ruoff, *Energy Environ. Sci.*, 2010, **3**, 1294).
